# Supplementary material for: Synthesis of zirconia sol stabilized by trivalent cations (yttrium and neodymium or americium): a precursor for Am-bearing cubic stabilized zirconia
Source: Royal Society of Chemistry journal article supplement (doi:10.1039/b919734f), 2010-01-01
Supplement: b919734f.pdf [file b919734f.pdf]

## Electronic Supplementary Information

# Synthesis of zirconia sol stabilized by trivalent cations (yttrium and neodymium or americium):

## A precursor for Am-bearing cubic stabilized zirconia

*Stephane Lemonnier, Stephane Grandjean\*, Anne-Charlotte Robisson, and Jean-Pierre Jolivet*

CEA, DEN, Laboratoire Chimie et Conversion des Actinides, Marcoule/DRCP/SCPS, Bât 399,  
BP 17171, F-30207 Bagnols sur Cèze Cedex, France

<sup>1</sup> Laboratoire de Chimie de la Matière Condensée, UMR CNRS 7574, Collège de France, Bât D, 11  
place Marcelin Berthelot 75231 Paris, France

Table I. Composition of solids formed in the sequenced titration of metallic cations (Zr, Y and/or Nd) and acacH mixture, based on infrared spectroscopy and X-Ray diffraction data.

| Exp. | Cations / mol dm <sup>-3</sup> |       |       |       | pH      | Remarks               | Yields (%) |    |    |      | Solid characterization                                         |                   |
|------|--------------------------------|-------|-------|-------|---------|-----------------------|------------|----|----|------|----------------------------------------------------------------|-------------------|
|      | Zr                             | Y     | Nd    | acacH |         |                       | Zr         | Y  | Nd | acac | IR                                                             | XRD               |
| 1    | 0.1                            | 0     | 0     | 0.1   | pH 2-6  | Unstable sol          | -          | 0  | 0  | -    | Zr(acac) <sub>4</sub>                                          | Amo. >><br>Cryst. |
| 2    | 0.1                            | 0     | 0     | 0.4   | pH = 4  | Partial precipitation | 79         | 0  | 0  | 75   | Zr(acac) <sub>4</sub>                                          | Cryst.            |
| 3    | 0                              | 0.025 | 0     | 0.025 | pH = 10 | Partial precipitation | 0          | 97 | 0  | 86   | Y(acac) <sub>3</sub> +<br>Y(OH) <sub>3</sub>                   | Amo. >><br>Cryst. |
| 4    | 0                              | 0.025 | 0     | 0.075 | pH = 8  | Partial precipitation | 0          | 81 | 0  | 73   | Y(acac) <sub>3</sub>                                           | Cryst.            |
| 5    | 0                              | 0     | 0.025 | 0.025 | pH = 10 | Partial precipitation | 0          | 0  | 93 | 48   | Nd(acac) <sub>3</sub> +<br>Nd(OH) <sub>3</sub>                 | Amo. >><br>Cryst. |
| 6    | 0                              | 0     | 0.025 | 0.075 | pH = 7  | Partial precipitation | 0          | 0  | 81 | 82   | Nd(acac) <sub>3</sub>                                          | Cryst.            |
| 7    | 0.1                            | 0.025 | 0.025 | 0.1   | pH 2-5  | Unstable sol          | -          | -  | -  | -    | Zr(acac) <sub>4</sub>                                          | Amo. >><br>Cryst. |
| 8    | 0.1                            | 0.025 | 0.025 | 0.1   | pH 6-7  | Stable sol            | -          | -  | -  | -    | Acac/M (*)                                                     | Amo. (*)          |
| 9    | 0.1                            | 0.025 | 0.025 | 0.4   | pH = 4  | Partial precipitation | 70         | 0  | 0  | 70   | Zr(acac) <sub>4</sub>                                          | Cryst.            |
| 10   | 0.1                            | 0.025 | 0.025 | 0.4   | pH = 8  | Partial precipitation | 99         | 42 | 62 | 71   | Zr(acac) <sub>4</sub> +<br>ZrO <sub>2</sub> .nH <sub>2</sub> O | Cryst. +<br>Amo.  |

Amo. = Amorphous. Cryst. = Crystallized. (\*) Gel obtained after a few weeks
